# Supplementary material
Source: Springer Nature journal article supplement (https://www.springermedizin.de/resource/supplementary/12885_2013_4084_MOESM10_ESM.pdf/9465260)
Supplement: MOESM10 [file 9465260]

**Table 1**

---

**Biological Process**

---

|                                                                  |                                                      |
|------------------------------------------------------------------|------------------------------------------------------|
| <b>cellular macromolecular complex assembly</b>                  | C=336;O=32;E=13.19;R=2.43;rawP=3.34e-06;adjP=0.0012  |
| <b>macromolecular complex subunit organization</b>               | C=741;O=55;E=29.09;R=1.89;rawP=3.63e-06;adjP=0.0012  |
| <b>macromolecular complex assembly</b>                           | C=672;O=51;E=26.38;R=1.93;rawP=4.49e-06;adjP=0.0012  |
| <b>organelle organization</b>                                    | C=1339;O=87;E=52.57;R=1.66;rawP=1.38e-06;adjP=0.0012 |
| <b>cellular macromolecular complex subunit organization</b>      | C=396;O=36;E=15.55;R=2.32;rawP=2.42e-06;adjP=0.0012  |
| <b>protein complex assembly</b>                                  | C=520;O=42;E=20.41;R=2.06;rawP=7.28e-06;adjP=0.0014  |
| <b>protein complex biogenesis</b>                                | C=520;O=42;E=20.41;R=2.06;rawP=7.28e-06;adjP=0.0014  |
| <b>cellular protein complex assembly</b>                         | C=184;O=21;E=7.22;R=2.91;rawP=1.12e-05;adjP=0.0019   |
| <b>proteasomal ubiquitin-dependent protein catabolic process</b> | C=107;O=15;E=4.20;R=3.57;rawP=1.79e-05;adjP=0.0022   |
| <b>proteasomal protein catabolic process</b>                     | C=107;O=15;E=4.20;R=3.57;rawP=1.79e-05;adjP=0.0022   |
| <b>interspecies interaction between organisms</b>                | C=280;O=27;E=10.99;R=2.46;rawP=1.56e-05;adjP=0.0022  |
| <b>cell cycle</b>                                                | C=895;O=60;E=35.14;R=1.71;rawP=2.98e-05;adjP=0.0033  |
| <b>amine biosynthetic process</b>                                | C=78;O=12;E=3.06;R=3.92;rawP=4.83e-05;adjP=0.0050    |
| <b>positive regulation of ubiquitin-protein ligase activity</b>  | C=67;O=11;E=2.63;R=4.18;rawP=5.37e-05;adjP=0.0052    |
| <b>positive regulation of ligase activity</b>                    | C=70;O=11;E=2.75;R=4.00;rawP=8.13e-05;adjP=0.0073    |
| <b>chromatin organization</b>                                    | C=364;O=30;E=14.29;R=2.10;rawP=0.0001;adjP=0.0084    |

---
